# Supplementary material for: Ageratum enation virus—A Begomovirus of Weeds with the Potential to Infect Crops
Source: MDPI journal article supplement (doi:10.3390/v7020647), 2015-02-10
Supplement: s1 [file s1]

## Supplementary Information

### *Ageratum enation virus*—A Begomovirus of Weeds with the Potential to Infect Crops

Muhammad Tahir, Imran Amin, Muhammad Saleem Haider, Shahid Mansoor and Rob W. Briddon

**Supplementary Table 1.** Nucleotide sequence identities between the complete nucleotide sequences of the begomovirus (isolates SOL, ACL, ABF and ACN) and other selected begomoviruses available in the databases.

| Isolates     | RaLCV (3) * | PedLCV (5) * | PaLCuV (6) * | TbCSV (7) * | AEV (26) * | ABF  | ACN  | ACL  | SOL |
|--------------|-------------|--------------|--------------|-------------|------------|------|------|------|-----|
| SOL          | 81.0–83.6   | 81.1–83.1    | 74.3–80.7    | 83.4–86.0   | 91.3–98.7  | 95.2 | 95.2 | 98.7 | 100 |
| ACL          | 80.9–83.5   | 81.2–83.0    | 74.0–80.6    | 83.2–85.7   | 91.1–98.7  | 95.6 | 95.2 | 100  |     |
| ACN          | 81.5–83.5   | 81.5–83.6    | 74.3–81.0    | 82.6–85.6   | 88.9–98.0  | 97.8 | 100  |      |     |
| ABF          | 81.9–84.1   | 81.6–83.9    | 74.9–81.5    | 82.9–85.6   | 88.9–97.8  | 100  |      |      |     |
| AEV (26) *   | 81.1–87.3   | 81.6–86.5    | 74.1–81.4    | 82.8–87.4   | 89.1–100   |      |      |      |     |
| TbCSV (7) *  | 80.0–83.9   | 78.7–82.2    | 71.7–79.2    | 91.5–99.7   |            |      |      |      |     |
| PaLCuV (6) * | 74.6–83.5   | 76.1–87.5    | 87.6–100     |             |            |      |      |      |     |
| PedLCV (5) * | 83.1–90.5   | 88.6–96.8    |              |             |            |      |      |      |     |
| RaLCV (3) *  | 96.3–99.0   |              |              |             |            |      |      |      |     |

\* The figures in brackets indicate the number of sequences of a particular virus species in the databases which were used for the comparisons.
